# Supplementary material
Source: PubMed Central journal article supplement (PMC5450370)
Supplement: jnm182980SupplementaryData.pdf [file jnm182980SupplementaryData.pdf]

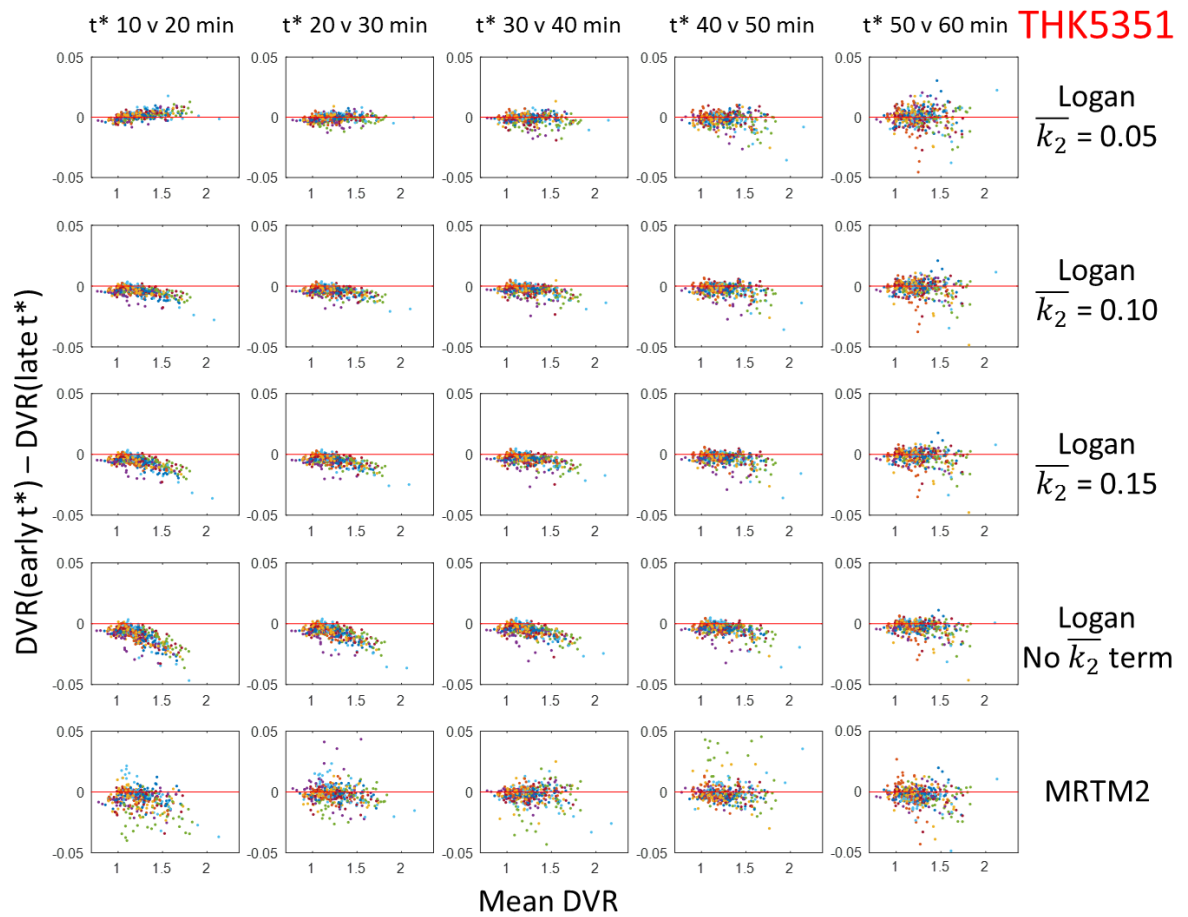

**SUPPLEMENTAL FIGURE 1.** Bland-Altman plots comparing DVR estimates with subsequent  $t^*$  values for Logan and MRTM2 for THK-5351. Each color represents an individual subject.

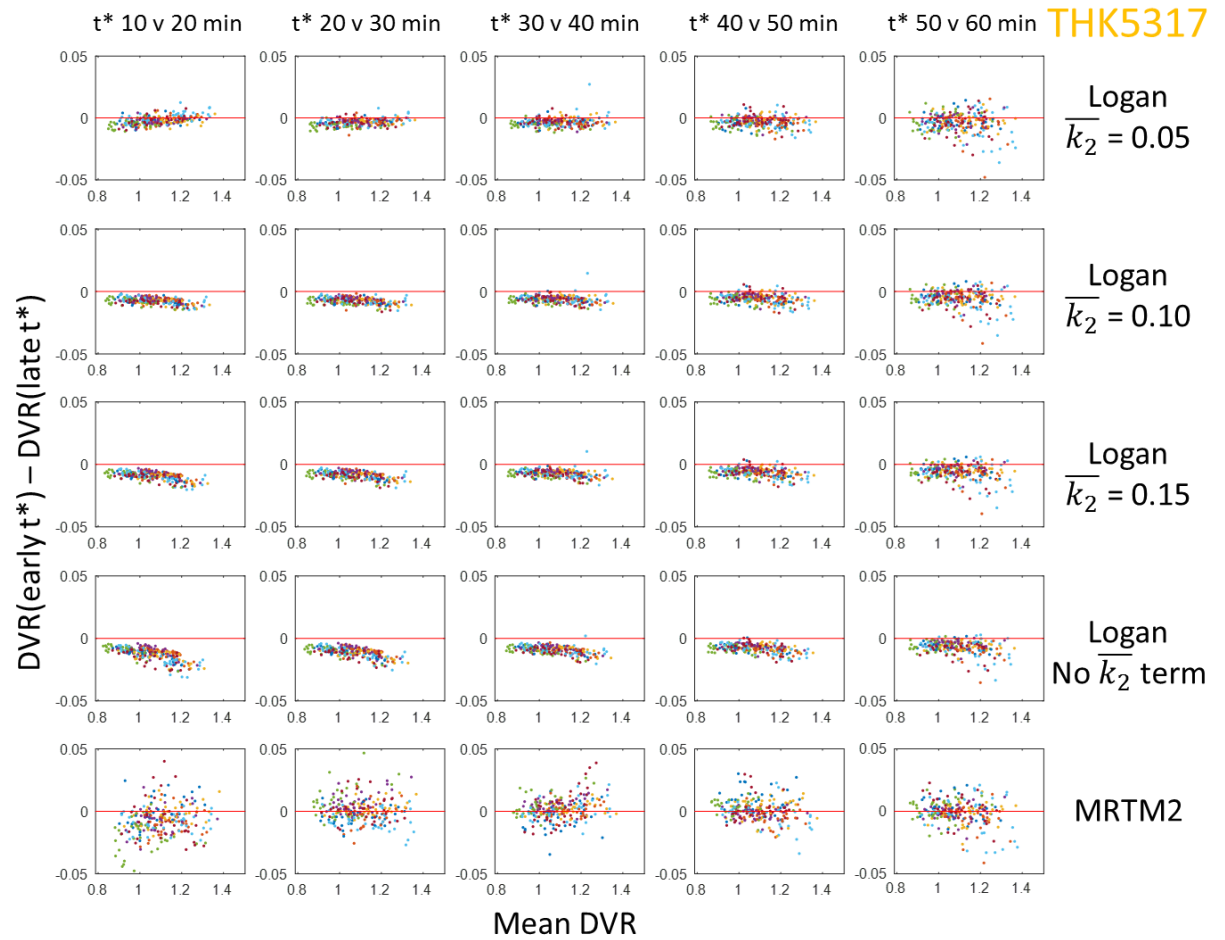

**SUPPLEMENTAL FIGURE 2.** Bland-Altman plots comparing DVR estimates with subsequent  $t^*$  values for Logan and MRTM2 for THK-5317. Each color represents an individual subject.

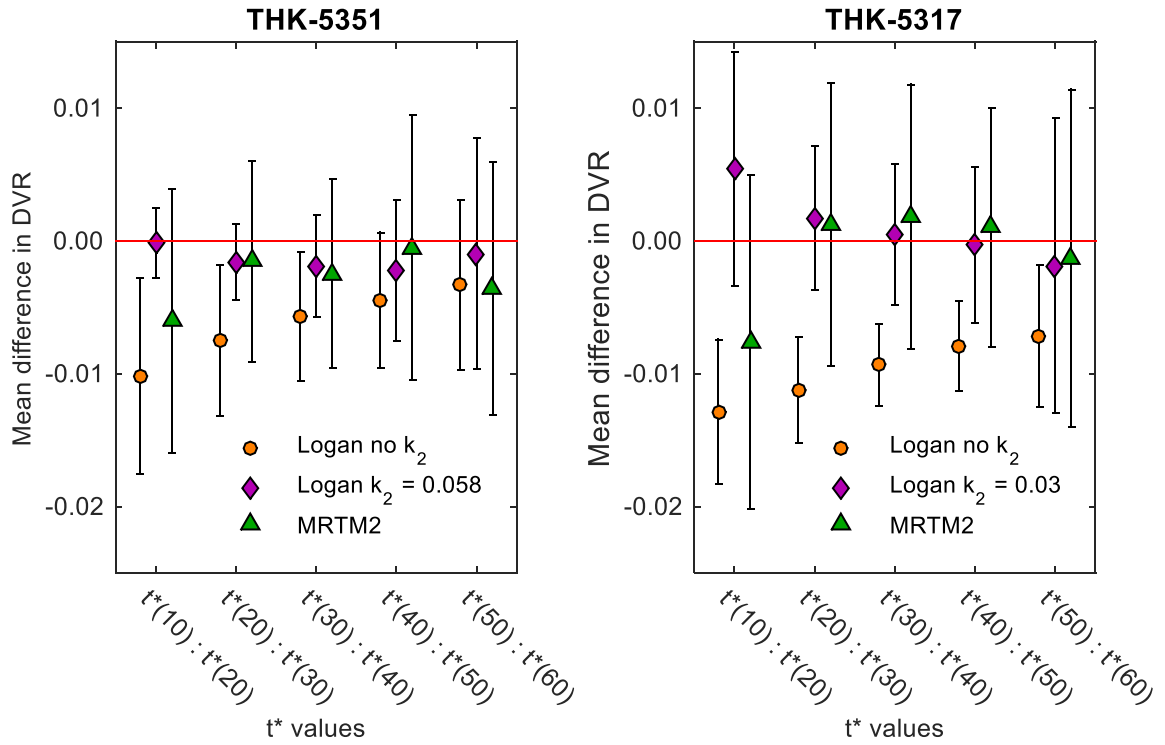

**SUPPLEMENTAL FIGURE 3.** Effects of  $t^*$  on DVR estimation for THK-5351 and THK-5317. Points represent mean difference between DVR estimates using the  $t^*$  values (e.g.  $t^*(10):t^*(20)$  compares DVR for  $t^*=10$  min minus DVR for  $t^*=20$  min) with error bars representing the standard deviation taken across all subjects and ROIs.

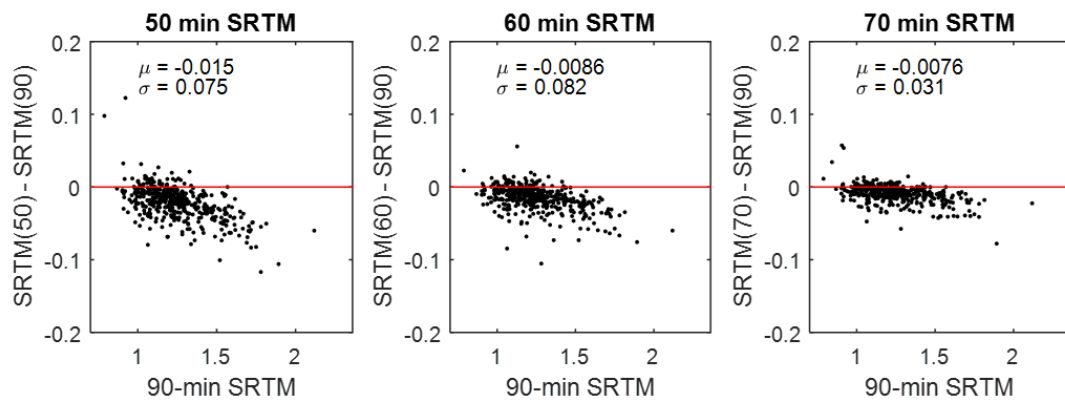

**SUPPLEMENTAL FIGURE 4.** Bland-Altman plots comparing the effects of shortening the PET scan duration for THK-5351 using SRTM.

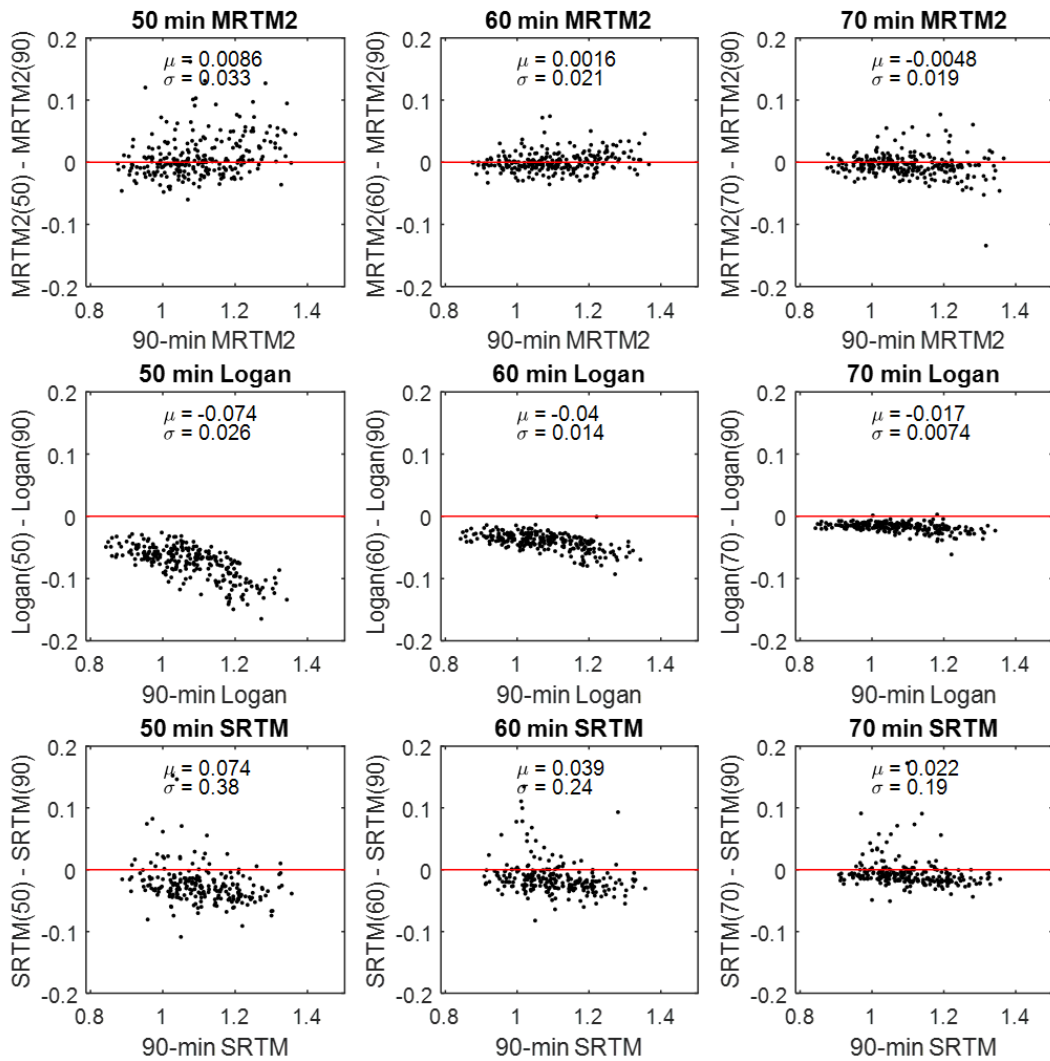

**SUPPLEMENTAL FIGURE 5.** Bland-Altman plots comparing the effects of shortening the PET scan duration on DVR estimation for THK-5317.

## THK5351 SUVR Stability

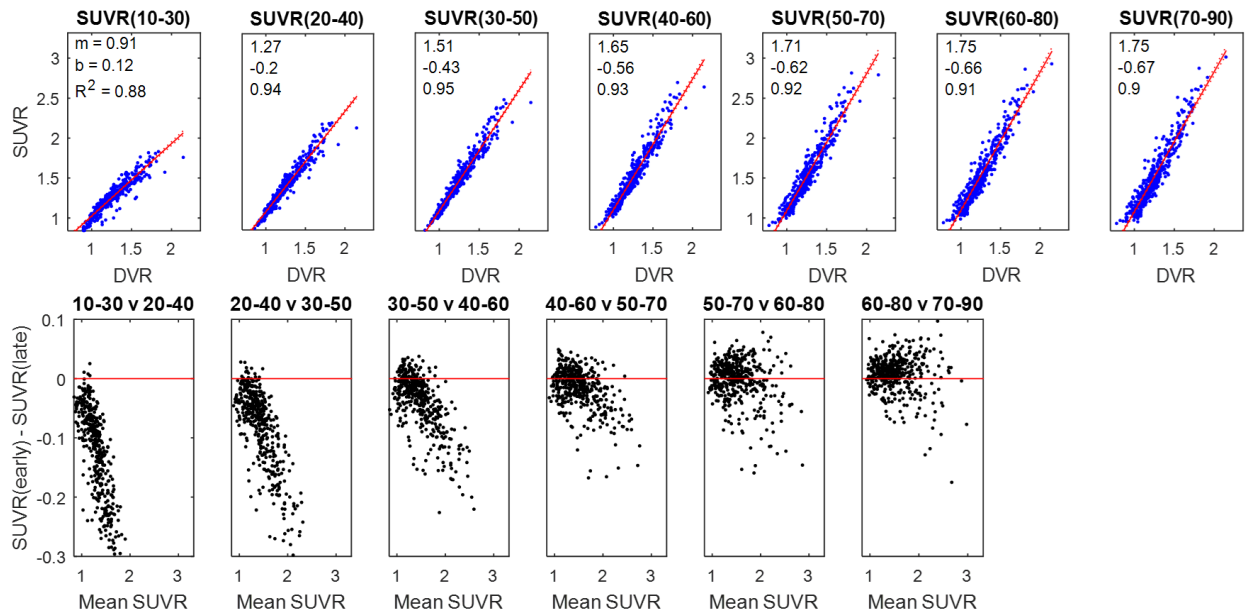

**SUPPLEMENTAL FIGURE 6.** Comparison of SUVR windows with MRTM2 DVR by linear regression (top) and stepwise comparisons of temporally adjacent SUVR windows using Bland-Altman plots (bottom) for THK-5351.

## THK5317 SUVR Stability

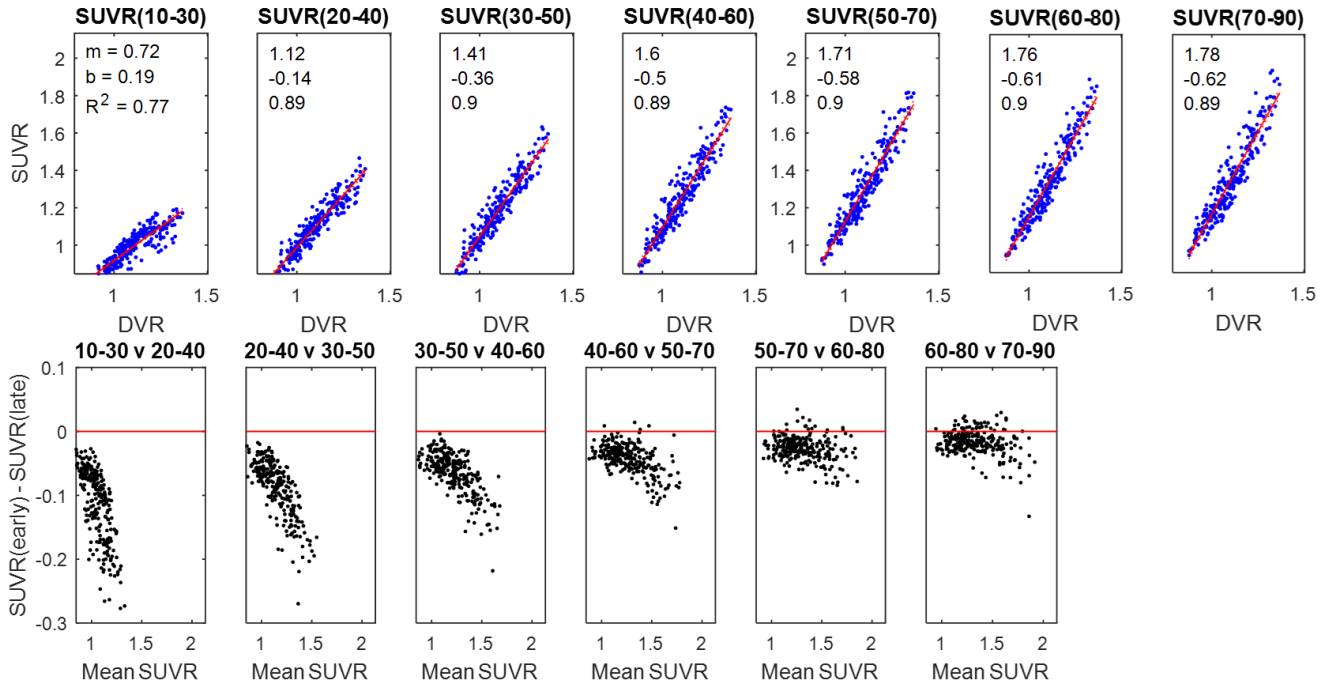

**SUPPLEMENTAL FIGURE 7.** Comparison of SUVR windows with MRTM2 DVR by linear regression (top) and stepwise comparisons of temporally adjacent SUVR windows using Bland-Altman plots (bottom) for THK-5317.

| Sex | Age (yrs) | Parental History | APOE-ε4 Status | Cognitive Status | MMS E     | PiB Status | Δt PiB THK-5317 (days) | Δt PiB THK-5351 (days) | <sup>18</sup> F-THK-5317 ID (MBq) | <sup>18</sup> F-THK-5351 ID (MBq) |
|-----|-----------|------------------|----------------|------------------|-----------|------------|------------------------|------------------------|-----------------------------------|-----------------------------------|
| M   | 73        | +                | -              | CD               | 29        | +          | 38                     | -292                   | 196.1                             | 203.5                             |
| F   | 70        | +                | +              | CS               | 29        | +          | 12                     | -470                   | 199.8                             | 395.9                             |
| F   | 67        | +                | +              | AD               | MoC A: 8  | +          | 1                      | -523**                 | 203.5                             | 403.3                             |
| F   | 75        | -                | +              | CD               | 27        | +          | 7                      | -447                   | 199.8                             | 196.1                             |
| M   | 62        | -                | -              | CS               | 30        | +          | 7                      | -333                   | 199.8                             | 395.9                             |
| F   | 82        | +                | +              | AD               | 17        | +          | -2                     |                        | 199.8                             |                                   |
| F   | 81        | -                | -              | MCI              | 29        | +          | 2                      |                        | 203.5                             |                                   |
| M   | 73        | -                | +              | CS               | 30        | -          | 3                      | -257                   | 203.5                             | 203.5                             |
| F   | 65        | +                | +              | CD               | 29        | +          | 370                    | -1                     | 199.8                             | 399.6                             |
| F   | 74        | +                | -              | CD               | 28        | +          | 2                      | -239                   | 203.5                             | 203.5                             |
| M   | 80        | +                | -              | MCI              | 28        | +          | 0                      | -342                   | 199.8                             | 392.2                             |
| F   | 53        | +                | +              | CS               | 30        | -          | 16                     | -306                   | 199.8                             | 395.9                             |
| F   | 57        | -                | +              | CS               | 30        | -          | 8                      | -298                   | 199.8                             | 399.6                             |
| M   | 70        | -                | -              | AD*              | MoC a: 20 | -          | -5                     |                        | 203.5                             |                                   |
| M   | 85        | NA               | +              | MCI              | 24        | -          |                        | -5                     |                                   | 199.8                             |
| F   | 61        | +                | +              | AD               | MoC a: 20 | +          |                        | -1                     |                                   | 203.5                             |
| M   | 74        | +                | +              | AD               | MoC a: 13 | +          |                        | -7                     |                                   | 203.5                             |
| M   | 71        | -                | +              | CD               | 29        | -          |                        | -7                     |                                   | 399.6                             |
| F   | 73        | -                | +              | CD               | 30        | -          |                        | -4                     |                                   | 392.2                             |
| F   | 68        | -                | +              | CS               | 30        | -          |                        | -25                    |                                   | 384.8                             |
| M   | 71        | +                | -              | NA               | 28        | -          |                        | 96                     |                                   | 384.8                             |
| M   | 73        | NA               | NA             |                  | 30        | -          |                        | -1                     |                                   | 392.2                             |
| F   | 68        | +                | +              | AD               | 25        | +          |                        | 0                      |                                   | 399.6                             |
| M   | 68        | +                | +              | CD               | 30        | -          |                        | -5                     |                                   | 403.3                             |
| M   | 72        | +                | +              | CS               | 30        | +          |                        | -3                     |                                   | 399.6                             |
| F   | 75        | -                | -              | CS               | 30        | -          |                        | -42                    |                                   | 392.2                             |
| M   | 67        | +                | -              | CD               | 29        | -          |                        | 61                     |                                   | 399.6                             |
| F   | 65        | -                | +              | CS               | 30        | -          |                        | 61                     |                                   | 395.9                             |

**SUPPLEMENTAL TABLE 1.** Summary statistics for the study participants. A negative time between PiB and THK scans indicates the PiB scan occurred prior to the THK scan, whereas a blank indicates the subject was not scanned with that THK compound. \*Subject 14 was diagnosed as probable AD prior to PET imaging, but did not indicate elevated THK or PiB binding and is likely a non-AD dementia. \*\*Significant motion during THK-5351 PET prevented estimation of binding. CS: cognitively stable, CD: cognitively declining, MCI: amnesic mild cognitive impairment, AD: probable AD evaluated prior to imaging data
